# Supplementary material for: Red blood cell omega-3 fatty acids and attention scores in healthy adolescents
Source: PubMed Central journal article supplement (PMC10576734; doi:10.1007/s00787-022-02064-w), 2022-08-12
Supplement: 787_2022_2064_MOESM1_ESM.pdf [file 787_2022_2064_MOESM1_ESM.pdf]

## Supplementary Information

### Red blood cell omega-3 fatty acids and attention scores in healthy adolescents

Ariadna Pinar-Martí<sup>1,2</sup>, Silvia Fernández-Barrés PhD<sup>1,2,3</sup>, Florence Gignac MSc<sup>1,2</sup>, Cecilia Persavento PhD<sup>2</sup>, Anna Delgado PhD<sup>2</sup>, Dora Romaguera PhD<sup>2,4,5</sup>, Iolanda Lázaro PhD<sup>6</sup>, Emilio Ros MD PhD<sup>5,7</sup>, Mònica López-Vicente PhD<sup>8</sup>, Jordi Salas-Salvadó MD PhD<sup>5,9,10</sup>, Aleix Sala-Vila PhD<sup>6,11\*</sup>, Jordi Júlvez PhD<sup>1,2,3,9,10\*</sup>

<sup>1</sup> Universitat Pompeu Fabra, Barcelona, Catalonia, Spain

<sup>2</sup> Barcelona Institute for Global Health (ISGlobal), Barcelona, Catalonia, Spain

<sup>3</sup> CIBER Epidemiología y Salud Pública, Instituto de Salud Carlos III, Madrid, Spain

<sup>4</sup> Instituto de Investigación Sanitaria Illes Balears, Hospital Universitari Son Espases, Palma, Spain

<sup>5</sup> CIBER Fisiopatología de la Obesidad y Nutrición, Instituto de Salud Carlos III (ISCIII), Madrid, Spain

<sup>6</sup> Cardiovascular risk and nutrition, IMIM (Hospital del Mar Medical Research Institute), Barcelona, Spain

<sup>7</sup> Lipid Clinic, Endocrinology and Nutrition Service, Hospital Clínic, Biomedical Research Institute August Pi i Sunyer (IDIBAPS), Barcelona, Spain.

<sup>8</sup> Department of Child and Adolescent Psychiatry and Psychology, Erasmus MC University Medical Center, Rotterdam, the Netherlands.

<sup>9</sup> Institut d'Investigació Sanitària Pere Virgili (IISPV), Hospital Universitari Sant Joan de Reus, Reus (Tarragona), Catalonia, Spain

<sup>10</sup> Universitat Rovira i Virgili, Facultat de Medicina i Ciències de la Salut, Human Nutrition Unit, Reus, Spain.

<sup>11</sup> The Fatty Acid Research Institute, Sioux Falls, SD, USA

**Target journal:** European Child & Adolescent Psychiatry

Corresponding author:

Jordi Julvez ([jordi.julvez@iispv.cat](mailto:jordi.julvez@iispv.cat))

\*JJ and ASV share equal contribution as senior authors.

**Supplementary Figure 1.** Directed Acyclic Graph (DAG) for investigating casual paths (possible confounders) between RBC PUFA levels and cognitive performance<sup>a</sup>.

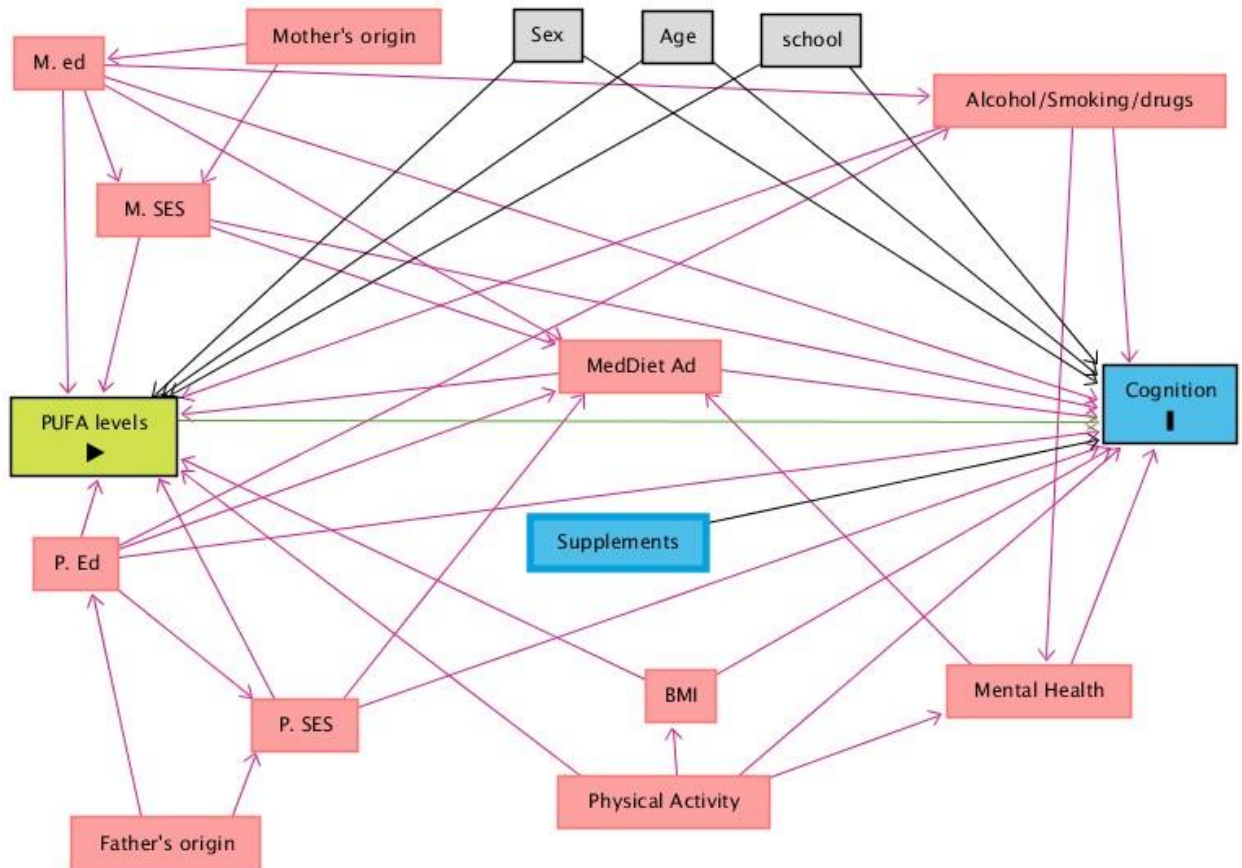

<sup>a</sup> Minimal sufficient adjustment sets containing Age, Sex, and center (school) for estimating the total effect of RBC PUFA levels on Cognition: Alcohol Consumption, Smoking habits, Drug consumption (Alcohol/Smoking/Drugs), Body Mass Index (BMI), Maternal and Paternal occupational social class (M. SES and P. SES), Maternal and Paternal educational level (M. ed and P. ed), Adherence to Mediterranean Diet (MedDiet Ad), Physical Activity. Drug consumption was not included in the main analyses due to low positive responses (n=15)

**Supplementary Table 1.** Extended descriptive characteristics of the study population

| Variable                                     | Available data (N) | Categories             | N (%) / Mean $\pm$ SD |
|----------------------------------------------|--------------------|------------------------|-----------------------|
| School center                                | 332                | Front Marítim          | 35 (10.54)            |
|                                              |                    | Ernest Lluch           | 27 (8.13)             |
|                                              |                    | Proa                   | 35 (10.54)            |
|                                              |                    | Joan Bosca             | 38 (11.45)            |
|                                              |                    | Solc                   | 35 (10.54)            |
|                                              |                    | Sedeta                 | 47 (14.16)            |
|                                              |                    | St. Miquel             | 34 (10.24)            |
|                                              |                    | Montserrat             | 35 (10.54)            |
|                                              |                    | Padre Damián           | 25 (7.53)             |
| Other                                        | 21 (6.33)          |                        |                       |
| Children characteristics                     |                    |                        |                       |
| Sex                                          | 332                | Female                 | 164 (49.40)           |
|                                              |                    | Male                   | 168 (50.60)           |
| Age                                          | 327                |                        | 13.84 $\pm$ 0.93      |
| BMI                                          | 328                | Kg/m <sup>2</sup>      | 20.32 $\pm$ 3.23      |
| Physical activity                            | 310                | <3 times/week          | 126 (40.65)           |
|                                              |                    | $\geq$ 3 times/week    | 184 (59.35)           |
| Alcohol consumption <sup>a</sup>             | 306                | No                     | 173 (56.54)           |
|                                              |                    | Yes                    | 133 (43.46)           |
| Smoking habits <sup>b</sup>                  | 309                | No                     | 248 (80.26)           |
|                                              |                    | Yes                    | 61 (19.74)            |
| Drug Consumption <sup>c</sup>                | 287                | No                     | 272 (94.77)           |
|                                              |                    | Yes                    | 15 (5.23)             |
| Mental Disorder <sup>d</sup>                 | 318                | No                     | 304 (95.60)           |
|                                              |                    | Yes                    | 14 (4.40)             |
| Adherence to Mediterranean Diet <sup>e</sup> | 305                | Low                    | 181 (59.34)           |
|                                              |                    | High                   | 124 (40.66)           |
| Fatty Fish intake <sup>f</sup>               | 291                | <4 servings/week       | 149 (51.20)           |
|                                              |                    | $\geq$ 4 servings/week | 142 (48.80)           |
| Nut intake <sup>g</sup>                      | 292                | <1 serving/week        | 153 (52.40)           |
|                                              |                    | $\geq$ 1 serving/week  | 139 (47.60)           |
| Supplement use                               | 305                | Iron                   | 2 (0.66)              |
|                                              |                    | Calcium + VitD         | 2 (0.66)              |
|                                              |                    | Omega 3                | 1 (0.33)              |
|                                              |                    | Multivitamin           | 5 (1.64)              |
|                                              |                    | Others                 | 4 (1.31)              |
| RBC C18:3n-3 (ALA)                           | 332                |                        | 0.11 $\pm$ 0.08       |
| RBC C22:6n-3 (DHA)                           | 332                |                        | 3.96 $\pm$ 0.84       |
| ANT HRT-SE <sup>h</sup>                      | 321                | Total Score (ms)       | 144.44 $\pm$ 75.40    |
| ANT HRT <sup>h</sup>                         | 322                | Total Score (ms)       | 568.66 $\pm$ 111.28   |
| Impulsivity Index <sup>h</sup>               | 256                | Total Score (ms)       | 59.44 $\pm$ 155.67    |
| Conflict response <sup>h</sup>               | 321                | Total Score (ms)       | 67.32 $\pm$ 32.77     |
| Orienting <sup>h</sup>                       | 322                | Total Score (ms)       | 28.79 $\pm$ 35.23     |
| Alerting <sup>h</sup>                        | 322                | Total Score (ms)       | 30.94 $\pm$ 39.88     |

|                           |     |                              |             |
|---------------------------|-----|------------------------------|-------------|
| Mother characteristics    |     |                              |             |
| Origin                    | 316 | Spain                        | 275 (87.03) |
|                           |     | Other                        | 41 (12.97)  |
| Education                 | 331 | Lower education <sup>i</sup> | 121 (36.56) |
|                           |     | University studies           | 210 (63.44) |
| Occupational social class | 309 | Manual                       | 36 (11.65)  |
|                           |     | No Manual                    | 248 (80.26) |
|                           |     | Other                        | 25 (8.09)   |
| Father characteristics    |     |                              |             |
| Origin                    | 316 | Spain                        | 269 (85.13) |
|                           |     | Other                        | 47 (14.87)  |
| Education                 | 329 | Lower education <sup>i</sup> | 141 (42.86) |
|                           |     | University studies           | 188 (57.14) |
| Occupational social class | 301 | Manual                       | 49 (16.28)  |
|                           |     | No Manual                    | 211 (70.10) |
|                           |     | Other                        | 41 (13.62)  |

BMI, Body Mass Index; ANT, Attention Network Test; HRT, hit reaction time; SE, standard error

<sup>a</sup> Defined as if they have ever consumed alcoholic beverages

<sup>b</sup> Defined as if they have ever smoked a cigarette, weather normal or electronic

<sup>c</sup> Defined as if they have ever used any drug other than alcohol and tobacco

<sup>d</sup> Defined as the presence of a diagnosed mental disorder

<sup>e</sup> A high score equals a score of 8 or more (of a total of 12)

<sup>f</sup> Constructed from the sum of all FFQ items related to seafood consumption (fatty fish, white fish, canned fish and fish by-products) and recategorized in two categories. One serving equals to a medium size steak, plate or portion for white and fatty fish, a small can for canned fish and two units for fish by-products (i.e. crab sticks). Categories cut-off points were selected based on statistical criteria, not based on clinical relevance

<sup>g</sup> Constructed from the sum of all FFQ items related to nut consumption (walnuts, almonds, hazelnuts and others) and recategorized in two categories. One serving equals to 1 handful or 6 units (just for walnuts). Categories cut-off points were selected based on statistical criteria, not based on clinical relevance

<sup>h</sup> Higher scores indicate worse attention performance

<sup>i</sup> Includes no studies, primary school and high school studies

**Supplementary Table 2.** Comparison of red blood cell proportions of C22:6n-3 (DHA) and C18:3n-3 (ALA) according to self-reported fish and nut consumption

| Fatty acid <sup>b</sup> | Self-reported fish consumption <sup>a</sup> |                                 |         | Self-reported nut consumption <sup>a</sup> |                               |         |
|-------------------------|---------------------------------------------|---------------------------------|---------|--------------------------------------------|-------------------------------|---------|
|                         | <4 servings<br>/week<br>(n=149)             | ≥4 servings<br>/week<br>(n=142) | P value | <1 serving<br>/week<br>(n=153)             | ≥1<br>serving/week<br>(n=139) | P value |
| C22:6n-3                | 3.82 (0.83)                                 | 4.22 (0.80)                     | <0.001  | 4.06 (0.81)                                | 3.98 (0.86)                   | 0.796   |
| C18:3n-3                | 0.10 (0.01)                                 | 0.11 (0.01)                     | 0.102   | 0.11 (0.01)                                | 0.11 (0.01)                   | 0.454   |

<sup>a</sup> Medians were used as cut-off points.

<sup>b</sup> Mean (SD). P value obtained by Student's t-test

**Supplementary Table 3.** Association between red blood cell proportions of C22:6n-3 (DHA) and C18:3n-3 (ALA) in tertiles and ANT scores on orienting network<sup>a</sup>

| Fatty acid <sup>b</sup>             | Orienting Network, ms           |       |                |         |                             |       |                 |         |
|-------------------------------------|---------------------------------|-------|----------------|---------|-----------------------------|-------|-----------------|---------|
|                                     | Minimally adjusted <sup>c</sup> |       |                |         | Fully adjusted <sup>d</sup> |       |                 |         |
|                                     | N                               | Coef. | (95% CI)       | P value | N                           | Coef. | (95% CI)        | P value |
| <b>C22:6n-3</b>                     |                                 |       |                |         |                             |       |                 |         |
| 1 <sup>st</sup> tertile<br>(3.12)   | 106                             | Ref.  |                |         | 76                          | Ref.  |                 |         |
| 2 <sup>nd</sup> tertile<br>(3.89)   | 104                             | 4.79  | (-5.07; 14.64) | 0.340   | 84                          | 2.39  | (-9.33; 14.10)  | 0.688   |
| 3 <sup>rd</sup> tertile<br>(4.75)   | 107                             | 2.67  | (-7.48; 12.82) | 0.605   | 89                          | -1.99 | (-14.12; 10.15) | 0.747   |
| Tertiles in continuous <sup>e</sup> | 317                             | 1.36  | (-3.71; 6.43)  | 0.599   | 249                         | -1.07 | (-7.12; 4.99)   | 0.729   |
| <b>C18:3n-3</b>                     |                                 |       |                |         |                             |       |                 |         |
| 1 <sup>st</sup> tertile<br>(0.06)   | 104                             | Ref.  |                |         | 85                          | Ref.  |                 |         |
| 2 <sup>nd</sup> tertile<br>(0.09)   | 104                             | 10.87 | (0.45; 21.29)  | 0.041   | 90                          | 7.04  | (-5.05; 19.13)  | 0.252   |
| 3 <sup>rd</sup> tertile<br>(0.14)   | 109                             | 5.15  | (-5.73; 16.03) | 0.353   | 74                          | 1.80  | (-10.79; 14.39) | 0.778   |
| Tertiles in continuous <sup>e</sup> | 317                             | 2.27  | (-3.19; 7.73)  | 0.414   | 249                         | 0.69  | (-5.60; 6.99)   | 0.828   |

CI, confidence interval; Ref, reference group; Coef.,  $\beta$  coefficients estimated by linear regression models; N, number of subjects with available data

<sup>a</sup> Higher scores indicate worse attention performance (orienting)

<sup>b</sup> Median of each fatty acid within tertile category

<sup>c</sup> Adjusted for: school center, age, and gender of the child

<sup>d</sup> Additionally adjusted for: body mass index of the child, alcohol consumption (have you ever consumed alcoholic beverages? yes/no), smoking habit (have you ever smoked a normal or electronic cigarette? yes/no), physical activity  $\geq 3$  times/week (yes/no), modified Mediterranean diet score (1-7 “low”/8-12 “high”), maternal educational level (university studies/lower education), paternal education level (university studies/lower education), maternal occupational social class (manual/non-manual) and paternal occupational social class (manual/non-manual)

<sup>e</sup> The p-value is P for trend

**Supplementary Table 4.** Association between red blood cell proportions of C22:6n-3 (DHA) and C18:3n-3 (ALA) in tertiles and ANT scores on alerting network<sup>a</sup>

| Fatty acid <sup>b</sup>             | Alerting Network, ms            |          |                 |       |                             |          |                 |       |
|-------------------------------------|---------------------------------|----------|-----------------|-------|-----------------------------|----------|-----------------|-------|
|                                     | Minimally adjusted <sup>c</sup> |          |                 |       | Fully adjusted <sup>d</sup> |          |                 |       |
| N                                   | Coef.                           | (95% CI) | P value         | N     | Coef.                       | (95% CI) | P value         |       |
| <b>C22:6n-3</b>                     |                                 |          |                 |       |                             |          |                 |       |
| 1 <sup>st</sup> tertile<br>(3.12)   | 106                             | Ref.     |                 | 76    | Ref.                        |          |                 |       |
| 2 <sup>nd</sup> tertile<br>(3.89)   | 104                             | -6.19    | (-17.33; 4.94)  | 0.275 | 84                          | -5.20    | (-18.21; 7.82)  | 0.432 |
| 3 <sup>rd</sup> tertile<br>(4.75)   | 107                             | -5.06    | (-16.52; 6.40)  | 0.385 | 89                          | -7.11    | (-20.59; 6.38)  | 0.300 |
| Tertiles in continuous <sup>e</sup> | 317                             | -2.55    | (-8.28; -3.17)  | 0.381 | 249                         | -3.52    | (-10.24; 3.21)  | 0.304 |
| <b>C18:3n-3</b>                     |                                 |          |                 |       |                             |          |                 |       |
| 1 <sup>st</sup> tertile<br>(0.06)   | 104                             | Ref.     |                 | 85    | Ref.                        |          |                 |       |
| 2 <sup>nd</sup> tertile<br>(0.09)   | 104                             | -0.67    | (-12.53; 11.19) | 0.911 | 90                          | 3.56     | (-9.90; 17.03)  | 0.603 |
| 3 <sup>rd</sup> tertile<br>(0.14)   | 109                             | -1.97    | (-14.36; 10.41) | 0.754 | 74                          | -2.43    | (-16.46; 11.59) | 0.733 |
| Tertiles in continuous <sup>e</sup> | 317                             | -0.99    | (-7.17; 5.17)   | 0.751 | 249                         | -1.38    | (-8.38; 5.62)   | 0.698 |

CI, confidence interval; Ref, reference group; Coef.,  $\beta$  coefficients estimated by linear regression models; N, number of subjects with available data

<sup>a</sup> Higher scores indicate worse attention performance (alerting)

<sup>b</sup> Median of each fatty acid within tertile category

<sup>c</sup> Adjusted for: school center, age, and gender of the child

<sup>d</sup> Additionally adjusted for: body mass index of the child, alcohol consumption (have you ever consumed alcoholic beverages? yes/no), smoking habit (have you ever smoked a normal or electronic cigarette? yes/no), physical activity  $\geq 3$  times/week (yes/no), modified Mediterranean diet score (1-7 “low”/8-12 “high”), maternal educational level (university studies/lower education), paternal education level (university studies/lower education), maternal occupational social class (manual/non-manual) and paternal occupational social class (manual/non-manual)

<sup>e</sup> The p-value is P for trend
